# Supplementary material
Source: PubMed Central journal article supplement (PMC7964687)
Supplement: 14-01333.pdf [file 14-01333.pdf]

**On-line Table: Details of cerebellar and cerebral brain injuries in the study patients**

| Outcome                         | Asphyxiated Newborns Treated with Hypothermia (n = 172) [n = 41] <sup>a</sup> |                                             |                                                  |                                                         |                                                              |                                                           |                                     |                            |   |                                  |
|---------------------------------|-------------------------------------------------------------------------------|---------------------------------------------|--------------------------------------------------|---------------------------------------------------------|--------------------------------------------------------------|-----------------------------------------------------------|-------------------------------------|----------------------------|---|----------------------------------|
|                                 | Alive (n = 143; 83%) [n = 38]                                                 |                                             |                                                  | Autopsy (n = 14; 48%) [n = 1]                           |                                                              |                                                           | Dead (n = 29; 17%) [n = 3]          |                            |   | No Autopsy (n = 15; 52%) [n = 2] |
|                                 | No Described Cerebellar Brain Injury (n = 138; 97%) [n = 36]                  | Cerebellar Brain Injury (n = 5; 3%) [n = 2] | No Described Cerebellar Brain Injury (n = 1; 7%) | Cerebellar Brain Injury Apoptosis (n = 10; 72%) [n = 1] | Cerebellar Acidophil Neurons (but No Apoptosis) (n = 3; 21%) | No Described Cerebellar Brain Injury (n = 3; 20%) [n = 1] | Cerebellar Brain Injury (n = 1; 7%) | No Brain MRI (n = 11; 73%) |   |                                  |
| No cerebral brain injury, n (%) | 77 (56) [21]                                                                  | —                                           | —                                                | —                                                       | —                                                            | —                                                         | —                                   | —                          | — | —                                |
| Cerebral brain injury, n (%)    | 61 (44) [15]                                                                  | 5 (100) [2]                                 | 1 (100)                                          | 10 (100) [1]                                            | 3 (100)                                                      | 3 (100) [1]                                               | 1 (100) [1]                         | —                          | — | —                                |
| Basal ganglia injury, n (%)     | 12 (20) [4]                                                                   | —                                           | —                                                | —                                                       | —                                                            | —                                                         | —                                   | —                          | — | —                                |
| Watershed injury, n (%)         | 27 (44) [6]                                                                   | 2 (40) [1]                                  | —                                                | —                                                       | —                                                            | —                                                         | —                                   | —                          | — | —                                |
| Total cortical injury, n (%)    | 22 (36) [5]                                                                   | 3 (60) [1]                                  | 1 (100)                                          | 10 (100) [1]                                            | 3 (100)                                                      | 3 (100) [1]                                               | 1 (100) [1]                         | —                          | — | —                                |

<sup>a</sup> Numbers in square brackets throughout indicate the number of newborns for whom both ADC and FA maps were available.
